# Supplementary material for: First Report of blaCTX-M-28 in Enterobacteriaceae Isolates in the United Arab Emirates
Source: J Pathog. 2018 Jan 18;2018:1304793. doi: 10.1155/2018/1304793 (PMC5822763; doi:10.1155/2018/1304793)
Supplement: Supplementary Materials — Specimen collection date/source/hospital unit and Antibiotic susceptibility profile for each isolate. [file 1304793.f1.xlsx]

## Sheet: Sheet1
S.NO	Collection date	Location	Specimen	Isolate(s)	Ampicillin	Amoxicillin/Calvulanic acid	Piperacilli/Tazobactam	Cefotaxime	Ceftazidime	Cefepime	Ertapenem	Imipenem	Meropenem	Amikiacin	Gentamicin	Ciprofloxacin	Norfloxacin	Fosfomycin	Nitrofurantoin	Trimethprim/Sulfamethoxazole	ESBL genes
1	2016-06-16	Outpatient	Urine	E. coli	R	S	S	R	R	R	S	S	S	S	S	S	S	S	S	S	blaCTX-M-167; blaCTX-M-28; blaTEM
2	2016-06-16	Outpatient	Urine	E. coli	R	S	S	R	R	R	S	S	S	S	R	S	S	S	S	S	blaCTX-M-28; blaTEM
3	2016-06-19	Inpatient	Urine	E. coli	R	I	S	R	R	R	S	S	S	S	S	R	R	S	S	R	blaCTX-M-28; blaTEM
4	2016-06-19	Inpatient	Urine	E. coli	R	I	S	R	R	R	S	S	S	S	S	R	R	S	S	R	blaCTX-M-28; blaSHV-148; blaTEM
5	2016-06-19	Outpatient	Urine	K. pneumoniae	R	S	S	R	R	R	S	S	S	S	R	S	I	S	I	S	blaCTX-M-28; blaSHV; blaTEM
6	2014-06-25	Inpatient	URINE	E. coli	R	R	S	R	R	R	S	S	S	S	R	S	S	S	S	S	blaCTX-M-28; blaSHV-187; blaTEM
7	2016-06-26	Inpatient	Urine	E. coli	R	S	S	R	R	R	S	S	S	S	S	R	R	S	S	S	blaCTX-M-28; blaSHV; blaTEM
8	2016-06-26	Inpatient	Urine	E. coli	R	S	S	R	R	R	S	S	S	S	S	S	S	S	S	R	blaCTX-M-28; blaTEM
9	2016-06-29	Inpatient	Sputum	E. coli	R	S	S	R	R	R	S	S	S	S	S	R	NA	S	NA	R	blaCTX-M; blaSHV; blaTEM
10	2016-06-29	Inpatient	Blood	E. coli	R	I	S	R	R	R	S	S	S	S	S	R	NA	S	NA	S	blaCTX-M-28; blaTEM-171
11	2016-06-29	Inpatient	Urine	E. coli	R	S	S	R	R	R	S	S	S	S	S	R	R	S	S	S	blaCTX-M-28; blaTEM
12	2016-06-30	Inpatient	Urine	K. pneumoniae	R	S	S	R	R	R	S	S	S	S	S	S	I	S	I	R	blaCTX-M-28; blaSHV; blaTEM
13	2016-06-30	Inpatient	Urine	E. coli	R	I	S	R	R	R	S	S	S	S	S	R	R	S	S	R	blaCTX-M-28; blaSHV; blaTEM-171
14	2016-06-30	Inpatient	Urine	E. coli	R	S	S	R	R	R	S	S	S	S	S	S	S	S	S	S	blaCTX-M; blaSHV; blaTEM
15	2016-07-04	Inpatient	Urine	E. coli	R	I	S	R	R	R	S	S	S	S	S	S	S	S	S	R	blaCTX-M28; blaSHV; blaTEM
16	2016-07-05	Inpatient	URINE	K oxytoca	R	S	S	R	R	R	S	S	S	S	S	S	S	S	S	R	blaCTX-M-28; blaSHV; blaTEM
17	2016-07-05	Inpatient	Urine	E. coli	R	I	S	R	R	R	S	S	S	S	S	R	R	S	S	R	blaCTX-M-28; blaSHV; blaTEM
18	2016-07-06	Inpatient	Urine	E. coli	R	S	S	R	R	R	S	S	S	S	S	R	R	S	S	S	blaCTX-M-28; blaTEM
19	2016-07-06	Inpatient	Urine	E. coli	R	S	S	R	R	R	S	S	S	S	S	S	S	S	S	R	blaCTX-M-28; blaTEM
20	2016-07-08	Inpatient	Urine	E. coli	R	S	S	R	R	R	S	S	S	S	S	R	R	S	S	R	blaCTX-M-28; blaTEM171
21	2016-07-08	Inpatient	Urine	E. coli	R	I	S	R	R	R	S	S	S	S	S	R	R	S	S	R	blaCTX-M-28; blaTEM
22	2016-07-10	Not recorded	Sputum	E. coli	R	R	I	R	R	R	S	S	S	S	S	R	NA	S	NA	R	blaCTX-M; blaSHV; blaTEM
23	2016-07-11	Inpatient	Pus	E. coli	R	I	S	R	R	R	S	S	S	S	R	S	NA	S	NA	S	blaCTX-M-198; blaCTX-M-28; blaTEM
24	2016-07-12	Inpatient	Urine	E. coli	R	I	S	R	R	R	S	S	S	S	S	R	R	S	I	R	blaCTX-M-28; blaTEM
25	2016-07-12	Outpatient	Urine	K. pneumoniae	R	R	S	R	R	R	S	S	S	S	R	S	I	S	I	S	blaCTX-M; blaSHV; blaTEM
26	2016-07-12	Outpatient	Urine	E. coli	R	I	S	R	R	R	S	S	S	S	R	R	R	S	S	S	blaCTX-M-167; blaCTX-M-28; blaSHV; blaTEM
27	2016-07-13	Inpatient	Urine	E. coli	R	S	S	R	R	R	S	S	S	S	S	R	R	S	S	R	blaCTX-M-28; blaTEM
28	2016-07-13	Inpatient	Urine	E. coli	R	S	S	R	R	R	S	S	S	S	S	S	S	S	S	S	blaCTX-M; blaTEM-171
29	2016-07-13	Inpatient	PUS	K. pneumoniae	R	I	S	R	R	R	S	S	S	S	R	R	NA	S	NA	R	blaCTX-M-28; blaSHV; blaTEM
30	2016-07-14	Outpatient	Urine	E. coli	R	I	S	R	R	R	S	S	S	S	S	R	R	S	R	R	blaCTX-M-28;
31	2016-07-15	Inpatient	Urine	E. coli	NA	NA	NA	NA	NA	NA	NA	NA	NA	NA	NA	NA	NA	NA	NA	NA	blaCTX-M-163; blaTEM-206
32	2016-07-18	Inpatient	Urine	E. coli	R	S	S	R	R	R	S	S	S	S	S	S	S	S	S	R	blaCTX-M-28; blaTEM-171
33	2016-07-18	Inpatient	Sputum	E. coli	R	I	S	R	R	R	S	S	S	S	S	I	NA	S	NA	R	blaCTX-M-28; blaSHV; blaTEM
34	2016-07-19	Outpatient	Urine	E. coli	R	S	S	R	R	R	S	S	S	S	S	R	R	S	S	S	blaCTX-M-28; blaSHV; blaTEM
35	2016-07-23	Outpatient	Urine	E. coli	R	S	S	R	R	R	S	S	S	S	S	R	R	S	I	R	blaCTX-M-28; blaCTX-M-38; blaTEM
36	2016-07-23	Inpatient	Urine	E. coli	R	S	S	R	R	R	S	S	S	S	S	S	S	S	S	R	blaCTX-M-28; blaTEM
37	2016-07-24	Inpatient	Urine	K. pneumoniae	R	S	S	R	R	R	S	S	S	S	S	S	I	S	I	S	blaCTX-M-28; blaTEM
38	2016-07-25	Inpatient	Pus	E. coli	R	I	R	R	R	R	S	S	S	S	S	R	NA	S	NA	R	blaCTX-M; blaTEM-206
39	2016-07-25	Inpatient	Sputum	E. coli	R	S	S	R	R	R	S	S	S	S	S	R	NA	S	NA	R	blaCTX-M-28; blaTEM-171
40	2016-07-25	Inpatient	Urine	E. coli	R	S	S	R	R	R	S	S	S	S	S	S	S	S	S	S	blaCTX-M-28; blaTEM-171
41	2016-07-26	Inpatient	Urine	E. coli	R	S	S	R	R	R	S	S	S	S	S	R	R	S	S	S	blaCTX-M-28; blaSHV; blaTEM-163
42	2016-07-26	Inpatient	Urine	E. coli	R	I	S	R	R	R	S	S	S	S	S	R	R	S	S	R	blaCTX-M-28; blaSHV; blaTEM-120
43	2016-07-27	Inpatient	Urine	E. coli	R	S	S	R	R	R	S	S	S	S	S	R	R	S	S	S	blaCTX-M-28; blaSHV; blaTEM
44	2016-07-30	Outpatient	Urine	E. coli	R	S	S	R	R	R	S	S	S	S	S	S	S	S	S	R	blaCTX-M-28; blaTEM; blaVIM
45	2017-07-30	Outpatient	Pus	E. coli	R	S	S	R	R	R	S	S	S	S	S	S	NA	S	NA	R	blaCTX-M; blaTEM; blaVIM
